# Supplementary material for: Master Regulators of Epithelial-Mesenchymal Transition and WNT Signaling Pathways in Juvenile Nasopharyngeal Angiofibromas
Source: MDPI journal article supplement (doi:10.3390/biomedicines9091258), 2021-09-18
Supplement: s1 [file s1]

**Table S1.** Primer sequences for the reference genes and selected transcripts evaluated by RT-qPCR.

| Gene symbol            | Primer sequences                                                      | Amplicon length |
|------------------------|-----------------------------------------------------------------------|-----------------|
| <b>Reference Genes</b> |                                                                       |                 |
| <i>GAPDH</i> *         | F - 5'TGCACCACCAACTGCTTAG3'<br>R - 5'GATGCAGGGATGATGTTC3'             | 176bp           |
| <i>GUSB</i> *          | F - 5'GAAAATACGTGGTTGGAGAGCTCATT3'<br>R - 5'CCGAGTGAAGATCCCCCTTTTA3'  | 101bp           |
| <i>RPLP0</i> *         | F - 5'GGAGACGCATTACACCTTC3'<br>R - 5'CTTCACCTTAGCTGGGG3'              | 139bp           |
| <b>Candidate Genes</b> |                                                                       |                 |
| <i>BCL2</i>            | F - 5'TGTGTGGAGAGCGTCAACCG3'<br>R - 5'TCAGAGACAGCCAGGAGAAATCA3'       | 181bp           |
| <i>CAV1</i>            | F - 5'ACCTCCTCACAGTTTTTCATCCAGC3'<br>R - 5'GCCTTGTTGTTGGGCTTGTAGAT3'  | 127bp           |
| <i>CD74</i>            | F - 5'GCTTTTCCATCCTGGTGA CTCTGC3'<br>R - 5'AGGCTTGGGAGGCTTGGA3'       | 155bp           |
| <i>COL4A2</i>          | F - 5'GGGGTGGAAGGTGACGCT3'<br>R - 5'CCCGTTGATGCCTGCGAA3'              | 106bp           |
| <i>FZD7</i>            | F - 5'TGGAGTTCTTTGAAATGTGCTGGAA3'<br>R - 5'GCTCCCATGATTCTCTGCTAAGCT3' | 125bp           |
| <i>ING1</i>            | F - 5'GAGTCCCTGCCTTTCGACTTGC3'<br>R - 5'GCGCTCGTAGCACTCGTCTA3'        | 102bp           |
| <i>LAMB1</i>           | F - 5'AAGCTGCCCAAACTCCGGG3'<br>R - 5'CGGCTTTCCTTCTGGCATCAGC3'         | 177bp           |
| <i>RAC2</i>            | F - 5'CACCGACACTCTCCAGGCTC3'<br>R - 5'GTCCACCATCACATTGGCTGAA3'        | 169bp           |

F = forward primer; R = reverse primer; \* reference genes

**Table S2.** Antibodies used to investigate the protein expression by immunohistochemistry.

| Antibody   | Catalog number | Clone  | Host                   | Dilution | Manufacturer                                 |
|------------|----------------|--------|------------------------|----------|----------------------------------------------|
| Anti-BCL2  | IS61430-2      | 124    | Mouse monoclo-<br>nal  | 1:300    | Dako-Agilent, Santa Clara, CA,<br>USA        |
| Anti-CAV1  | ab32577        | E249   | Rabbit monoclo-<br>nal | 1:250    | Abcam, Cambridge, UK                         |
| Anti-CD74  | sc-6262        | LN-2   | Mouse Monoclo-<br>nal  | 1:100    | Santa Cruz Biotechnology, Dallas,<br>TX, USA |
| Anti-FZD7  | GWB-E6553E     | -      | Rabbit Polyclo-<br>nal | 1:200    | Genway Biotech, San Diego, CA,<br>USA        |
| Anti-RAF1  | ab181115       | EP4969 | Rabbit monoclo-<br>nal | 1:250    | Abcam, Cambridge, UK                         |
| Anti-WNT5A | ab235966       | -      | Rabbit Polyclo-<br>nal | 1:300    | Abcam, Cambridge, UK                         |
| Anti-WNT5B | ab150602       | -      | Rabbit Polyclo-<br>nal | 1:400    | Abcam, Cambridge, UK                         |

(-) polyclonal antibodies.

**Table S3.** Relevant biological processes and pathways associated with the differentially expressed genes according to the Enrichr tool analysis. The top 10 enriched terms in the BioCarta, Gene Ontology (GO), Kyoto Encyclopedia of Genes and Genomes (KEGG), and NCI-Nature gene-set libraries are listed.

| Enriched terms                                                                    | Adjusted $p$ -value<br>( $-\log_{10}$ ) | Combined Score<br>( $\log_2$ ) | Genes                                                                                                                  |
|-----------------------------------------------------------------------------------|-----------------------------------------|--------------------------------|------------------------------------------------------------------------------------------------------------------------|
| <b>BioCarta</b>                                                                   |                                         |                                |                                                                                                                        |
| TGF beta signaling pathway                                                        | 2.263694899                             | 8.280064325                    | <i>TGFB2; SMAD4; CDH1</i>                                                                                              |
| IGF-1 Signaling Pathway                                                           | 2.263694899                             | 8.280064325                    | <i>MAPK8; IGF1; RAF1</i>                                                                                               |
| Inhibition of Cellular Proliferation by Gleevec                                   | 2.263694899                             | 8.070895405                    | <i>MAPK8; BCL2; RAF1</i>                                                                                               |
| CTCF: First Multivalent Nuclear Factor                                            | 2.263694899                             | 7.973733049                    | <i>TGFB2; SMAD4; CDKN1B</i>                                                                                            |
| Ceramide Signaling Pathway                                                        | 1.888179013                             | 7.188755253                    | <i>MAPK8; BCL2; RAF1</i>                                                                                               |
| NFAT and Hypertrophy of the heart                                                 | 1.704595592                             | 6.560751421                    | <i>MAPK8; EDN1; IGF1</i>                                                                                               |
| Multiple antiapoptotic pathways from IGF-1R signaling lead to BAD phosphorylation | 1.704595592                             | 7.800489752                    | <i>IGF1; RAF1</i>                                                                                                      |
| Melanocyte Development and Pigmentation Pathway                                   | 1.704595592                             | 7.800489752                    | <i>BCL2; RAF1</i>                                                                                                      |
| p53 Signaling Pathway                                                             | 1.704595592                             | 7.800489752                    | <i>BCL2; TIMP3</i>                                                                                                     |
| Regulation of p27 Phosphorylation during Cell Cycle Progression                   | 1.704595592                             | 7.800489752                    | <i>CDKN1B; SKP1</i>                                                                                                    |
| <b>GO</b>                                                                         |                                         |                                |                                                                                                                        |
| Cell-cell junction organization                                                   | 2.897650209                             | 7.935079405                    | <i>CDH6; TJP1; TGFB2; CDH3; CDH1; CLDN1</i>                                                                            |
| Regulation of transforming growth factor beta2 production                         | 2.897650209                             | 11.32001038                    | <i>SMAD4; TGFB2; CDH3</i>                                                                                              |
| Extracellular matrix organization                                                 | 2.897650209                             | 6.772564798                    | <i>MMP11; POSTN; TGFB2; COL4A2; CDH1; SERPINE1; ICAM3; LAMB1; LOXL2</i>                                                |
| Regulation of macrophage cytokine production                                      | 2.45462084                              | 10.15038089                    | <i>CD74; TGFB2; WNT5A</i>                                                                                              |
| Cell morphogenesis                                                                | 2.45462084                              | 7.718758321                    | <i>CDH6; TGFB2; CDH3; CDH1; RAC2</i>                                                                                   |
| Positive regulation of epithelial cell proliferation                              | 2.430283943                             | 7.041373946                    | <i>CDH3; FZD7; WNT5A; LAMB1; SOX9; IGF1</i>                                                                            |
| Negative regulation of cellular process                                           | 2.430283943                             | 5.729957251                    | <i>AZGP1; TGFB2; SMAD4; CDKN1B; FTH1; CAV1; PDCD5; BHLHE40; BCL2; PPT1; RAF1; ING1</i>                                 |
| Epithelial to mesenchymal transition                                              | 2.226162771                             | 7.949843228                    | <i>TGFB2; WNT5A; SOX9; LOXL2</i>                                                                                       |
| Regulation of ossification                                                        | 2.226162771                             | 7.891397721                    | <i>TGFB2; WNT5A; SOX9; PRKACA</i>                                                                                      |
| Regulation of calcineurin-NFAT signaling cascade                                  | 2.226162771                             | 9.080132971                    | <i>RCAN1; RCAN3; IGF1</i>                                                                                              |
| <b>KEGG</b>                                                                       |                                         |                                |                                                                                                                        |
| Pathways in cancer                                                                | 6.466298191                             | 7.236709876                    | <i>TGFB2; SMAD4; EDN1; CDKN1B; FZD7; WNT5A; LAMB1; IGF1; MAPK8; COL4A2; CDH1; BCL2; RAC2; RAC3; PRKACA; RAF1; SKP1</i> |
| AGE-RAGE signaling pathway in diabetic complications                              | 5.323196874                             | 8.256314229                    | <i>TGFB2; SMAD4; EDN1; MAPK8; CDKN1B; COL4A2; SERPINE1; BCL2</i>                                                       |
| Colorectal cancer                                                                 | 4.695419164                             | 8.101592401                    | <i>MAPK8; TGFB2; SMAD4; RAC2; BCL2; RAC3; RAF1</i>                                                                     |

|                                                                |             |             |                                                            |
|----------------------------------------------------------------|-------------|-------------|------------------------------------------------------------|
| Focal adhesion                                                 | 4.463028935 | 7.111825763 | MAPK8; COL4A2; CAV1; BCL2; RAC2; RAC3; LAMB1; IGF1; RAF1   |
| Proteoglycans in cancer                                        | 4.463028935 | 7.08791045  | TGFB2; FZD7; CAV1; WNT5A; ITPR1; TIMP3; IGF1; PRKACA; RAF1 |
| Gastric cancer                                                 | 4.463028935 | 7.345942753 | TGFB2; SMAD4; CDKN1B; CDH1; FZD7; WNT5A; BCL2; RAF1        |
| Wnt signaling pathway                                          | 4.337917928 | 7.20898761  | SMAD4; MAPK8; FZD7; WNT5A; RAC2; RAC3; PRKACA; SKP1        |
| Pancreatic cancer                                              | 4.213871002 | 7.84405439  | MAPK8; TGFB2; SMAD4; RAC2; RAC3; RAF1                      |
| Estrogen signaling pathway                                     | 3.808795298 | 7.040826917 | KRT19; KRT15; ITPR1; BCL2; KRT13; PRKACA; RAF1             |
| Hippo signaling pathway                                        | 3.414787704 | 6.675556184 | TGFB2; SMAD4; CDH1; YWHAB; FZD7; SERPINE1; WNT5A           |
| <b>NCI-NATURE</b>                                              |             |             |                                                            |
| Role of Calcineurin-dependent NFAT signaling in lymphocytes    | 3.000308833 | 7.955865881 | RCAN1; MAPK8; YWHAB; BCL2; PRKACA                          |
| Validated targets of C-MYC transcriptional repression          | 2.930105281 | 7.573292518 | SMAD4; CDKN1B; FTH1; WNT5A; BCL2                           |
| Class I PI3K signaling events mediated by Akt                  | 2.930105281 | 8.135257715 | CDKN1B; YWHAB; PRKACA; RAF1                                |
| Signaling events mediated by Stem cell factor receptor (c-Kit) | 2.319674044 | 7.202381679 | MAPK8; GRB10; BCL2; RAF1                                   |
| HIF-1-alpha transcription factor network                       | 2.111786644 | 6.672375961 | EDN1; SMAD4; SERPINE1; BHLHE40                             |
| Wnt signaling network                                          | 2.111786644 | 7.545603799 | IGFBP4; FZD7; WNT5A                                        |
| Signaling events mediated by VEGFR1 and VEGFR2                 | 2.111786644 | 6.605374227 | CAV1; GRB10; PRKACA; RAF1                                  |
| Noncanonical Wnt signaling pathway                             | 2.021480507 | 7.255617428 | MAPK8; FZD7; WNT5A                                         |
| Signaling events regulated by Ret tyrosine kinase              | 1.851701712 | 6.881629075 | MAPK8; GRB10; PRKACA                                       |
| Ceramide signaling pathway                                     | 1.777919174 | 6.560751421 | MAPK8; BCL2; RAF1                                          |

**Table S4.** Comparison between tumor and normal samples for each transcript and analysis category.

| Genes         | cDNA microarray |        | Array dependent validation |        | Array independent validation |        |
|---------------|-----------------|--------|----------------------------|--------|------------------------------|--------|
|               | Fold# (T/N)     | P      | Fold# (T/N)                | P      | Fold# (T/N)                  | P      |
| <i>BCL2</i>   | -6.29           | 0.005* | -1.47                      | 0.064  | -5.10                        | 0.002* |
| <i>CAV1</i>   | 6.71            | 0.005* | 2.44                       | 0.045* | 1.19                         | 0.516  |
| <i>CD74</i>   | -2.56           | 0.005* | -5.49                      | 0.045* | -8.64                        | 0.006* |
| <i>COL4A2</i> | 5.53            | 0.005* | 16.62                      | 0.045* | 3.68                         | 0.023* |
| <i>FZD7</i>   | -10.56          | 0.005* | -1.70                      | 0.165  | -3.62                        | 0.292  |
| <i>ING1</i>   | -2.74           | 0.005* | -1.98                      | 0.123  | -2.09                        | 0.019* |
| <i>LAMB1</i>  | 4.83            | 0.005* | 2.14                       | 0.045* | 4.17                         | 0.029* |
| <i>RAC2</i>   | -4.05           | 0.005* | -3.42                      | 0.045* | -1.78                        | 0.168  |

\* Mann-Whitney statistical test significance ( $P < 0.05$ ); \*Fold based on median of tumor (T) and normal samples (N).
